# Supplementary material for: Dysregulation of antimicrobial peptide expression distinguishes Alzheimer’s disease from normal aging
Source: publisher site journal article supplement (doi:10.18632/aging.102650), 2020-01-06
Supplement: Supplementary file [file aging-v12i1-102650-supplementary-material-SD1.pdf]

# SUPPLEMENTARY FIGURES

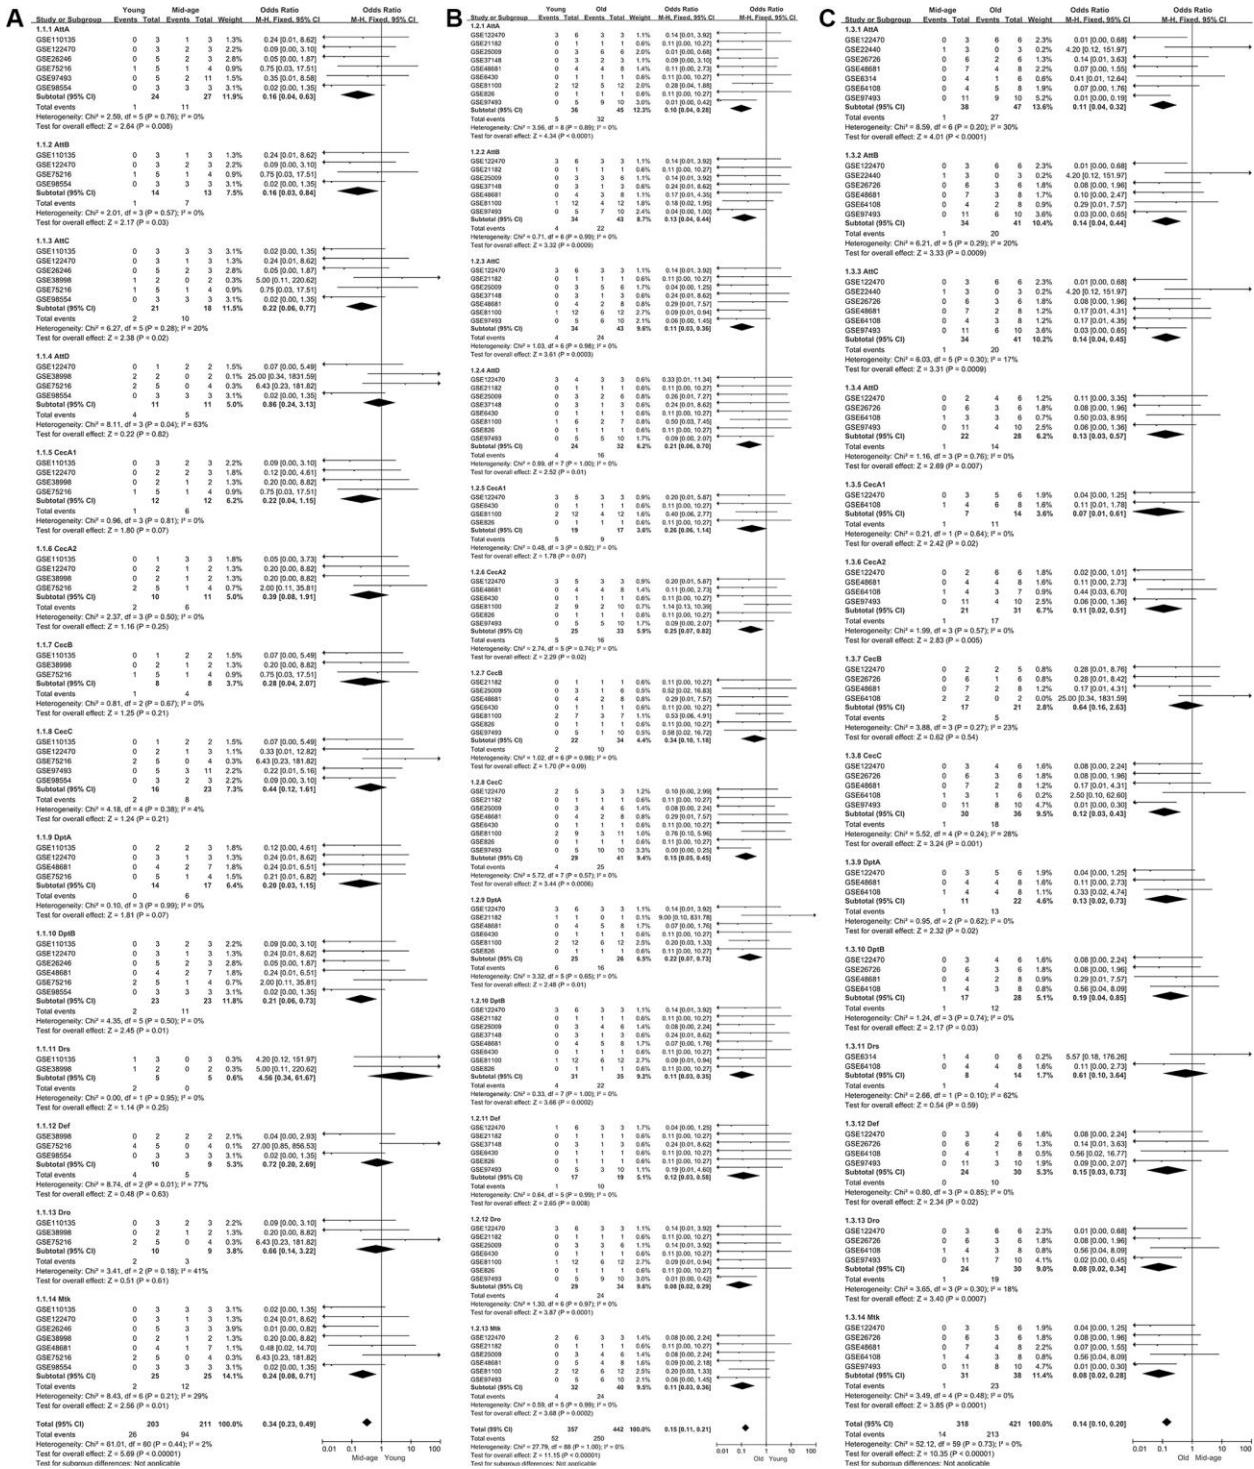

**Supplementary Figure 1. Forest plot for comparing AMP gene expression differences among different age groups based on the data mined from the GEO database.** The random and fixed effects model (Mantel-Haenszel method) was used in the meta-analysis. Comparison between the middle-aged and young (A), old and middle-aged (B), and old and young (C) groups all demonstrated increased expression among AMP genes in older groups, suggesting that there was a general rising trend in AMP expression during aging.
