# Supplementary material for: Dysregulation of antimicrobial peptide expression distinguishes Alzheimer’s disease from normal aging
Source: publisher site journal article supplement (doi:10.18632/aging.102650), 2020-01-06
Supplement: Supplementary file [file aging-v12i1-102650-supplementary-material-SD2.pdf]

## SUPPLEMENTARY TABLE

Supplementary Table 1. Primers used for quantitative real-time PCR (qPCR) analysis.

| Gene  | Forward (5' to 3')    | Reverse (5' to 3')    |
|-------|-----------------------|-----------------------|
| AttA  | ATCGCCCAATCGTGCTACTAC | ATGATGAGATAGACCCAGGCC |
| AttB  | TCTCTGGTCATCGCCCAATC  | CCAGCACCAAAGTTTGGCTT  |
| AttC  | TCATGGAGCTACCCTGACGC  | AGCCTTGTGTTGCGATCCTG  |
| AttD  | AACGCCAATGGTCATGCACT  | TCAGAGCGGCGTTATTGCTC  |
| CecA  | TTCGTCGCTCTCATTCTGGC  | ATCCCGAGTGTGCTGACCAA  |
| CecB  | CACTCATCCTGGCCATCAGC  | CGATTCCGAGGACCTGGATT  |
| CecC  | CTCATCCTGGCCATCAGCAT  | CGCAATCCCAGTCCTTGAA   |
| DptA  | TTTTGGCTTTGCAGTCCAGG  | GTCTCCCAAGTGCTGTCCA   |
| DptB  | CCCTATCCTGATCCCCGAGA  | CCATTCAATTGGAACCTGGCG |
| Drs   | TCTTCGCTGTCCTGATGCTG  | AGGTCTCGTTGTCCCAGACG  |
| Def   | AGGCTCAGCCAGTTTCCGAT  | AGTAGGTCGCAATGTGGCTCG |
| Dro   | CTGCTGCTTGCTTGCGTTTT  | GTGATCCTCGATGGCCAGTG  |
| Mtk   | CACGGCTACATCAGTGCTGG  | AATTGGACCCGGTCTTGGTT  |
| LysS  | CGACGGACGCTTCTCCTACA  | TGCTGGCTGAGGACCTTCTG  |
| RpL32 | GCCCAACATCGGTTACGGAT  | TGCATGAGCAGGACCTCCAG  |
